# Supplementary material for: Formation mechanisms of macroscopic globules in andesitic glasses from the Izu–Bonin–Mariana forearc (IODP Expedition 352)
Source: Springer Nature journal article supplement (doi:10.1007/s00410-020-01756-3), 2020-12-23
Supplement: MOESM1 [file 410_2020_1756_MOESM1_ESM.xlsx]

## Sheet: Sheet1
Table S1 - Results of the in situ measurements of the B isotopic composition of the Izu Bonin Globular andesites via MC-LA-ICP-MS
	11B	11B/10Bm	SE	correction factor	11B/10Bc	±s(%)	d11B	±s
	(mV)					(%)	(‰)	(‰)
Andesitic Groundmass 19R-1418	0.00956294	4.55444	0.0119185	0.869591	4.01595	0.261689	-9.5082	2.61689
	0.0091173	4.55125	0.0150093	0.869564	4.01301	0.329784	-10.2334	3.29784
	0.00885579	4.60366	0.0131471	0.869538	4.05909	0.285579	1.13326	2.85579
	0.00906739	4.57669	0.0119083	0.869513	4.03521	0.260194	-4.75838	2.60194
	0.00904138	4.59707	0.0183175	0.869489	4.05306	0.39846	-0.354985	3.9846
	0.00895008	4.57821	0.0109962	0.869467	4.03633	0.240186	-4.48153	2.40186
	0.00904567	4.60839	0.0170628	0.869445	4.06284	0.370256	2.05753	3.70256
	0.00878847	4.62506	0.0128622	0.869425	4.07744	0.278097	5.65883	2.78097
	0.00874911	4.56955	0.0133903	0.869406	4.02841	0.293033	-6.43504	2.93033
	0.00874808	4.56568	0.0149247	0.869388	4.02491	0.326889	-7.29711	3.26889
	0.00887569	4.60309	0.0178568	0.86937	4.05781	0.387931	0.816677	3.87931
	0.00894524	4.63038	0.0100111	0.869354	4.08179	0.216206	6.73143	2.16206
	0.00874984	4.61848	0.0148347	0.869338	4.07123	0.321203	4.12626	3.21203
	0.00855857	4.63922	0.0182388	0.869324	4.08944	0.393145	8.61856	3.93145
	0.00870594	4.57578	0.0172968	0.86931	4.03345	0.378008	-5.19058	3.78008
	0.00837324	4.601	0.0202429	0.869297	4.05563	0.439967	0.27753	4.39967
	0.00851431	4.59883	0.0219953	0.869284	4.05366	0.478281	-0.208356	4.78281
Andesitic Groundmass 19R-6466	0.00971636	4.63823	0.0208646	0.869273	4.08833	0.449841	8.34436	4.49841
	0.00906589	4.61929	0.0163837	0.869262	4.07158	0.35468	4.21381	3.5468
	0.00789371	4.59212	0.000119996	0.869252	4.04759	0.00261309	-1.70314	0.0261309
	0.00765497	4.60084	0.022902	0.869242	4.05523	0.497779	0.180304	4.97779
	0.007927	4.60792	0.0191529	0.869233	4.06144	0.415651	1.71059	4.15651
	0.00783317	4.52327	0.0133716	0.869225	3.98678	0.295617	-16.702	2.95617
	0.00772987	4.6236	0.0254595	0.869217	4.07517	0.550643	5.09916	5.50643
	0.00767351	4.57846	0.0201936	0.86921	4.03536	0.441056	-4.72052	4.41056
	0.00759936	4.58487	0.0101291	0.869203	4.04098	0.220924	-3.33472	2.20924
	0.00801455	4.59054	0.0197319	0.869197	4.04594	0.429839	-2.11077	4.29839
Globules 19R-6466	0.14196	4.68978	0.00157747	0.869191	4.07631	0.0336363	5.37959	0.336363
	0.14269	4.69159	0.00169597	0.869185	4.07786	0.0361491	5.76205	0.361491
	0.142752	4.69785	0.00145054	0.86918	4.08328	0.0308767	7.09802	0.308767
	0.157078	4.69653	0.00157421	0.869175	4.08211	0.0335186	6.80954	0.335186
	0.153905	4.69419	0.00155497	0.869171	4.08006	0.0331254	6.30339	0.331254
	0.146453	4.69436	0.00165441	0.869167	4.08018	0.0352425	6.33451	0.352425
	0.162533	4.69594	0.00143196	0.869163	4.08154	0.0304936	6.66907	0.304936
	0.144441	4.69395	0.00154925	0.86916	4.07979	0.0330052	6.23764	0.330052
	0.13018	4.69061	0.00180609	0.869144	4.07682	0.0385044	5.50505	0.385044
	0.132071	4.69449	0.00171298	0.869142	4.08017	0.0364892	6.33227	0.364892
	0.128063	4.69266	0.00170447	0.869139	4.07858	0.036322	5.93866	0.36322
	0.129064	4.69664	0.00180832	0.869137	4.08203	0.0385024	6.7888	0.385024
	0.131641	4.69602	0.00209252	0.869134	4.08147	0.0445594	6.65207	0.445594
	0.138559	4.70001	0.00192719	0.869132	4.08492	0.041004	7.50379	0.41004
	0.138065	4.70035	0.00187113	0.869129	4.08521	0.0398084	7.57534	0.398084
	0.145768	4.69358	0.00158701	0.869127	4.07931	0.0338124	6.12021	0.338124
	0.147764	4.68903	0.00164018	0.869124	4.07535	0.034979	5.142	0.34979
	0.149746	4.69041	0.00149177	0.869121	4.07653	0.0318048	5.43409	0.318048
	0.120537	4.6948	0.00215452	0.869118	4.08034	0.0458917	6.37216	0.458917
	0.124487	4.69742	0.00174919	0.869115	4.0826	0.0372373	6.92964	0.372373
	0.136263	4.69268	0.00169871	0.869112	4.07847	0.0361991	5.91163	0.361991
	0.102041	4.7046	0.00200597	0.869109	4.08881	0.0426384	8.46303	0.426384
	0.163618	4.69143	0.00152876	0.869105	4.07735	0.0325863	5.63457	0.325863
	0.149576	4.6897	0.00146439	0.869102	4.07582	0.0312257	5.2592	0.312257
	0.120682	4.69004	0.00206958	0.869098	4.07611	0.0441271	5.32888	0.441271
	0.119014	4.69879	0.00179349	0.869094	4.08369	0.0381691	7.19932	0.381691
	0.127478	4.69602	0.00142876	0.869089	4.08126	0.030425	6.59996	0.30425
Globules 19R-1418	0.155128	4.68368	0.00166224	0.869084	4.07052	0.0354901	3.95011	0.354901
	0.116185	4.69145	0.00178723	0.869079	4.07724	0.0380955	5.60794	0.380955
	0.149004	4.68464	0.00157935	0.869074	4.07129	0.0337135	4.1419	0.337135
	0.13426	4.69006	0.00165546	0.869068	4.07598	0.0352973	5.29741	0.352973
	0.102189	4.68664	0.00210397	0.869062	4.07298	0.044893	4.55727	0.44893
	0.111551	4.69117	0.00201471	0.869055	4.07688	0.0429468	5.52099	0.429468
	0.103946	4.69168	0.00224164	0.869048	4.0773	0.0477791	5.62241	0.477791
	0.137237	4.69507	0.00150946	0.869041	4.08021	0.03215	6.3408	0.3215
	0.117202	4.68325	0.00158488	0.869033	4.0699	0.0338413	3.79847	0.338413
	0.112995	4.69008	0.00132698	0.869024	4.0758	0.0282932	5.2528	0.282932
	0.121478	4.69063	0.00137667	0.869015	4.07623	0.0293493	5.35852	0.293493
	0.166165	4.69852	0.00142919	0.869006	4.08304	0.0304179	7.0389	0.304179
	0.148514	4.69707	0.00143202	0.868996	4.08173	0.0304876	6.71699	0.304876
	0.103665	4.69716	0.00207154	0.868986	4.08177	0.0441019	6.72471	0.441019
	0.105053	4.69319	0.00211142	0.868975	4.07827	0.0449891	5.86139	0.449891
	0.111487	4.69444	0.00197473	0.868964	4.0793	0.0420652	6.11598	0.420652
	0.113551	4.68849	0.00203875	0.868951	4.07407	0.0434841	4.82786	0.434841
Void 19R-1418	0.0612347	4.69067	0.00386041	0.868939	4.0759	0.0822997	5.27905	0.822997
	0.0741366	4.6955	0.00261418	0.868926	4.08004	0.0556741	6.29953	0.556741
	0.122264	4.68868	0.00215888	0.868912	4.07405	0.0460444	4.82254	0.460444
	0.262491	4.69724	0.00143362	0.868897	4.08142	0.0305205	6.63991	0.305205
	0.48608	4.7077	0.00117726	0.868882	4.09044	0.0250072	8.86388	0.250072
	0.400589	4.70915	0.00132376	0.868866	4.09162	0.0281103	9.15466	0.281103
	0.111023	4.69427	0.00188173	0.86885	4.07861	0.0400856	5.94739	0.400856
	0.353864	4.70973	0.00138482	0.868833	4.09197	0.0294035	9.24037	0.294035
vein dark 19R-1418	0.276691	4.70575	0.00139882	0.868645	4.08763	0.0297258	8.17041	0.297258
	0.307191	4.70925	0.00123574	0.86862	4.09055	0.0262408	8.89183	0.262408
	0.3399	4.70449	0.00138696	0.868595	4.0863	0.0294815	7.84274	0.294815
	0.310048	4.70632	0.00135756	0.868568	4.08776	0.0288454	8.20287	0.288454
	0.316288	4.6995	0.0013535	0.868541	4.08171	0.0288008	6.71145	0.288008
	0.31048	4.69915	0.00148553	0.868513	4.08128	0.0316128	6.60445	0.316128
	0.32323	4.6943	0.00133298	0.868484	4.07693	0.0283958	5.53101	0.283958
	0.314093	4.68716	0.00122881	0.868455	4.07059	0.0262166	3.96739	0.262166
	0.3254	4.70022	0.00121672	0.868424	4.08179	0.0258865	6.72997	0.258865
	0.318231	4.697	0.00127224	0.868393	4.07884	0.0270861	6.00367	0.270861
	0.202821	4.71366	0.00169199	0.86836	4.09316	0.0358954	9.53399	0.358954
	0.117155	4.67768	0.0016283	0.868327	4.06176	0.0348099	1.78942	0.348099
	0.101839	4.67817	0.00199093	0.868293	4.06202	0.0425578	1.85564	0.425578
	0.139051	4.68273	0.00132072	0.868258	4.06581	0.0282041	2.7903	0.282041
	0.122027	4.65907	0.0016911	0.868109	4.04457	0.0362969	-2.4479	0.362969
	0.220859	4.70396	0.00122281	0.868069	4.08336	0.0259953	7.11874	0.259953
	0.175791	4.70992	0.0014602	0.868028	4.08835	0.0310025	8.34757	0.310025
	0.227124	4.70047	0.00130472	0.867987	4.07995	0.0277571	6.2764	0.277571
	0.260236	4.69482	0.00123683	0.867944	4.07484	0.0263445	5.01697	0.263445
	0.255814	4.70039	0.00126562	0.867901	4.07947	0.0269258	6.1595	0.269258
vein dark 19R-6466	0.294228	4.70339	0.0012665	0.867857	4.08187	0.0269274	6.75014	0.269274
	0.333346	4.69633	0.00124435	0.867811	4.07553	0.0264963	5.18669	0.264963
	0.326061	4.68121	0.00125381	0.867765	4.06219	0.0267839	1.89693	0.267839
	0.297656	4.68348	0.00134414	0.867718	4.06394	0.0286996	2.32826	0.286996
	0.369257	4.67452	0.00131998	0.86767	4.05594	0.0282379	0.354567	0.282379
	0.292938	4.70645	0.00121272	0.867621	4.08341	0.0257673	7.13022	0.257673
	0.175224	4.6924	0.00183014	0.86757	4.07099	0.0390023	4.06668	0.390023
	0.270761	4.68933	0.00122745	0.867519	4.06808	0.0261754	3.35047	0.261754
	0.365133	4.69227	0.00120783	0.867467	4.07039	0.0257409	3.91853	0.257409
	0.271384	4.6676	0.00127219	0.867414	4.04874	0.0272557	-1.42016	0.272557
	0.320016	4.68877	0.00137054	0.86736	4.06685	0.0292302	3.04583	0.292302
vein light 19R-6466	0.307471	4.68693	0.00116839	0.867305	4.065	0.0249286	2.58973	0.249286
	0.226426	4.69025	0.00134019	0.867249	4.06762	0.0285739	3.23561	0.285739
	0.127527	4.70048	0.00188224	0.867192	4.07622	0.0400435	5.35784	0.400435
	0.273388	4.68503	0.00124274	0.867134	4.06255	0.0265257	1.98481	0.265257
	0.413955	4.64014	0.00114351	0.867075	4.02335	0.0246439	n/a	n/a
	0.175973	4.69022	0.001523	0.867015	4.06649	0.0324719	n/a	n/a
	0.238691	4.67403	0.00122461	0.866954	4.05217	0.0262003	-0.574538	0.262003
	0.211465	4.69453	0.00141967	0.866893	4.06965	0.0302409	3.73662	0.302409
	0.314634	4.67538	0.00121022	0.86683	4.05276	0.0258849	n/a	n/a
	0.249431	4.67267	0.00124842	0.866766	4.05011	0.0267175	n/a	n/a
	0.239437	4.68793	0.00140098	0.866701	4.06303	0.0298847	2.105	0.298847
	0.260095	4.69227	0.00136929	0.866635	4.06649	0.0291819	2.95677	0.291819
	0.250142	4.69239	0.00159289	0.866569	4.06628	0.0339463	2.90567	0.339463
STHS60-80	0.0229561	4.66278	0.00441919	0.865772	4.03691	0.0947758	-4.33937	0.947758
	0.0247381	4.65814	0.00462084	0.865694	4.03253	0.0991991	-5.41946	0.991991
	0.0218913	4.66904	0.00437399	0.865615	4.04159	0.0936807	-3.18403	0.936807
	0.0227951	4.66302	0.00431023	0.865536	4.03601	0.0924343	-4.56125	0.924343
	0.0199673	4.65857	0.00416147	0.865455	4.03178	0.0893294	-5.60349	0.893294
	0.0217813	4.66148	0.00367646	0.865373	4.03392	0.0788689	-5.07484	0.788689
	0.024899	4.66824	0.00450223	0.865291	4.03939	0.0964438	-3.72722	0.964438
	0.0268131	4.67171	0.00448548	0.865207	4.04199	0.0960137	-3.08424	0.960137
BCR-2G	0.0253154	4.6639	0.00498326	0.864778	4.03324	0.106848	-5.2436	1.06848
	0.0284397	4.65943	0.0044915	0.86469	4.02896	0.0963959	-6.2981	0.963959
	0.0302416	4.66387	0.00465793	0.8646	4.03239	0.0998727	-5.45386	0.998727
	0.0251256	4.66289	0.00453816	0.86451	4.03112	0.0973249	-5.76657	0.973249
	0.025521	4.66907	0.00446182	0.86442	4.03603	0.0955613	-4.55435	0.955613
	0.0307413	4.66681	0.00568668	0.864328	4.03365	0.121854	-5.14177	1.21854
	0.0302615	4.65974	0.00373464	0.864236	4.02712	0.0801469	-6.75418	0.801469
BHVO	0.0266628	4.59857	0.00404311	0.86968	4.05527	0.0879211	0.190998	0.879211
	0.0230253	4.5893	0.00473766	0.869649	4.04895	0.103233	-1.36774	1.03233
	0.0228418	4.58742	0.00513894	0.869619	4.04715	0.112022	-1.81237	1.12022
	0.0214977	4.58942	0.00546994	0.868714	4.04471	0.119186	-2.41504	1.19186
	0.0201522	4.58853	0.00446499	0.868692	4.04382	0.0973076	-2.63445	0.973076
	0.0231373	4.58706	0.00466902	0.868669	4.04241	0.101787	-2.98086	1.01787
